# Supplementary material for: High-efficiency organic light-emitting diodes based on cationic iridium(iii) complexes with double tridentate ligands
Source: Royal Society of Chemistry journal article supplement (doi:10.1039/d4tc03255a), 2024-01-01
Supplement: d4tc03255a1.pdf [file d4tc03255a1.pdf]

## Supporting Information

### **High-efficiency organic light-emitting diodes based on cationic iridium(III) complexes with double tridentate ligands**

Yang Kang,<sup>†a</sup> Sheng Ren,<sup>†b</sup> Zhao Zhi Ying,<sup>†a</sup> Tong Bi-Hai,<sup>\*a,c</sup> Chen Ping<sup>\*b</sup> and Kong Hui<sup>\*a</sup>

<sup>a</sup> School of Metallurgy Engineering, Anhui University of Technology, Maanshan, 243002, Anhui, China. E-mail: tongbihai@163.com, konghui@ahut.edu.cn.

<sup>b</sup> Shandong College Laboratory of Optoelectronic Functional Materials and Optoelectronic Devices, Institute of Science and Technology for Opto-Electronic Information, Yantai University, Yantai, 264005, Shandong, China. E-mail: pingchen@jlu.edu.cn.

<sup>c</sup> State Key Laboratory of Coordination Chemistry, Nanjing University, Nanjing, 210023, China.

<sup>†</sup> These authors contributed equally to this work.

\* Corresponding authors.

#### **Contents:**

1. General descriptions
2. The supplementary crystallographic data
3. Photophysical properties
4. The supplementary device data
5. The <sup>1</sup>H/<sup>19</sup>F-NMR and high-resolution mass spectrometers (HRMS) spectra of all new compounds
6. References

## 1. General descriptions

### 1.1. Materials and characterization

All the materials and solvents were obtained commercially and used as received without further purification. Proton NMR spectra were measured on a Bruker AV400 spectrometer. High resolution mass spectra (HRMS) were recorded with a TOF 5600<sup>plus</sup> mass spectrometer. X-ray crystallography diffraction was carried out on a Bruker SMART Apex CCD diffractometer. Cyclic voltammetry (CV) was measured on a CHI1140B Electrochemical Analyzer through a three-electrode system with a glassy carbon disk as the working electrode, platinum plate as the counter electrode and Ag/AgCl as the reference electrode. UV/Vis absorption spectra were recorded on a Purkinje General TU-1901 spectrophotometer. The PL spectra were recorded on a PerkinElmer LS-55 fluorescence spectrophotometer. The PL quantum efficiency and lifetime were measured with an Edinburgh FLS980 instrument.

### 1.2. Computational methodology

B3LYP functional was used to optimize the geometrical structures of ground state ( $S_0$ ).<sup>[1]</sup> A “double- $\xi$ ” quality basis set consisting of Hay and Wadt’s effective core potentials (ECP), LANL2DZ,<sup>[2]</sup> was employed to the Ir atom. 6-31G(d) basis set<sup>[3]</sup> was applied to other nonmetallic atoms. The solvent effect in  $\text{CH}_2\text{Cl}_2$  medium was considered throughout the calculations. Combined with VMD program,<sup>[5]</sup> the molecular orbital was visualized by Multiwfn code.<sup>[4]</sup> The frontier molecular orbital (FMO) distribution in molecules was analyzed by Multiwfn using Mulliken population analysis. Gaussian 16 software package was used for calculations.<sup>[6]</sup>

### 1.3. OLED fabrication

In a general procedure, indium tin oxide (ITO)-coated glass substrates were etched, patterned, and washed with detergent, deionized water, acetone, and ethanol in turn. For vacuum-deposited OLEDs, the ITO substrate was loaded in a deposition chamber and conducted with the treatment of ultraviolet ozone. Vacuum chambers were employed to deposit metal layer and organic layer, and the base pressure was higher than  $8 \times 10^{-5}$  Pa. For spin-coating OLEDs, PEDOT:PSS was spin-coated to smooth the ITO surface and to promote hole injection, and then the emissive layer was spin-coated from a chlorobenzene solution, on which an electron-transporting/hole-blocking layer

and metal layer were deposited in a vacuum chamber at a pressure of  $8 \times 10^{-5}$  Pa. EL spectra were collected on a Spectra Scan PR655 photometer. Current density–voltage–luminance (J-V-L) measurements were recorded simultaneously using a Keithley 4200 semiconductor parameter analyzer coupled with a Newport Multi-Function 2835-C optical meter, which measured luminance in the forward direction. All device characterizations were carried out under ambient laboratory conditions at room temperature without encapsulation.

## 2. The supplementary crystallographic data.

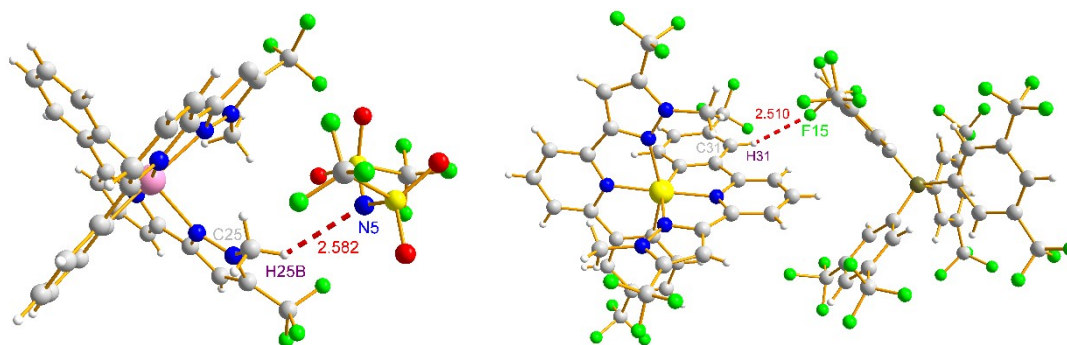

**Fig. S1** Intramolecular hydrogen bonds in the single crystal of complexes **1b** (left, H(25B)-N(5) = 2.582 Å,  $\angle$ C(25)-H(25B)  $\cdots$ N(5) = 138 °) and **2** (right, H(31)-F(15) = 2.510 Å,  $\angle$ C(31)-H(35)  $\cdots$ F(15) = 158 °).

**Table S1** Crystallographic and refinement data for complexes

|                              | <b>1b</b>                                                                                      | <b>2</b>                                                          |
|------------------------------|------------------------------------------------------------------------------------------------|-------------------------------------------------------------------|
| Empirical formula            | C <sub>34</sub> H <sub>22</sub> F <sub>12</sub> IrN <sub>7</sub> O <sub>4</sub> S <sub>2</sub> | C <sub>66</sub> H <sub>32</sub> BF <sub>36</sub> IrN <sub>6</sub> |
| Formula weight               | 1076.90                                                                                        | 1795.98                                                           |
| Temperature/K                | 296.15                                                                                         | 296(2)                                                            |
| Crystal system               | orthorhombic                                                                                   | monoclinic                                                        |
| Space group                  | P212121                                                                                        | P2 <sub>1</sub> /c                                                |
| a/Å                          | 9.4185(11)                                                                                     | 13.152(3)                                                         |
| b/Å                          | 11.7390(14)                                                                                    | 18.686(5)                                                         |
| c/Å                          | 34.800(4)                                                                                      | 28.086(7)                                                         |
| $\alpha$ /°                  | 90                                                                                             | 90                                                                |
| $\beta$ /°                   | 90                                                                                             | 90.010(10)                                                        |
| $\gamma$ /°                  | 90                                                                                             | 90                                                                |
| Volume/Å <sup>3</sup>        | 3847.6(8)                                                                                      | 6902(3)                                                           |
| Z                            | 4                                                                                              | 4                                                                 |
| $\rho$ calcg/cm <sup>3</sup> | 1.859                                                                                          | 1.728                                                             |
| $\mu$ /mm <sup>-1</sup>      | 3.686                                                                                          | 2.078                                                             |

|                                                 |                                                                           |                                                                           |
|-------------------------------------------------|---------------------------------------------------------------------------|---------------------------------------------------------------------------|
| F(000)                                          | 2096.0                                                                    | 3504.0                                                                    |
| Crystal size/mm <sup>3</sup>                    | 0.23 × 0.21 × 0.2                                                         | 0.22 × 0.2 × 0.18                                                         |
| Radiation                                       | MoK $\alpha$ ( $\lambda$ = 0.71073)                                       | MoK $\alpha$ ( $\lambda$ = 0.71073)                                       |
| 2 $\theta$ range for datacollection/ $^{\circ}$ | 4.48 to 54.946                                                            | 4.056 to 52.096                                                           |
| Index ranges                                    | -12 $\leq$ h $\leq$ 12, -13 $\leq$ k $\leq$ 15,<br>-39 $\leq$ l $\leq$ 45 | -16 $\leq$ h $\leq$ 16, -20 $\leq$ k $\leq$ 22, -34<br>$\leq$ l $\leq$ 30 |
| Reflections collected                           | 24328                                                                     | 38472                                                                     |
| Independent reflections                         | 8669 [R <sub>int</sub> = 0.0311,<br>R <sub>sigma</sub> = 0.0559]          | 13448 [R <sub>int</sub> = 0.0457,<br>R <sub>sigma</sub> = 0.0541]         |
| Data/restraints/parameters                      | 8669/562/544                                                              | 13448/1081/993                                                            |
| Goodness-of-fit on F <sup>2</sup>               | 1.066                                                                     | 1.029                                                                     |
| Final R indexes [ $I \geq 2\sigma(I)$ ]         | R <sub>1</sub> = 0.0320, wR <sub>2</sub> = 0.0596                         | R <sub>1</sub> = 0.0554, wR <sub>2</sub> = 0.1464                         |
| Final R indexes [all data]                      | R <sub>1</sub> = 0.0386, wR <sub>2</sub> = 0.0614                         | R <sub>1</sub> = 0.0852, wR <sub>2</sub> = 0.1631                         |
| Largest diff. peak/hole / e $\text{\AA}^{-3}$   | 0.63/-1.72                                                                | 1.62/-0.96                                                                |

### 3. Photophysical properties

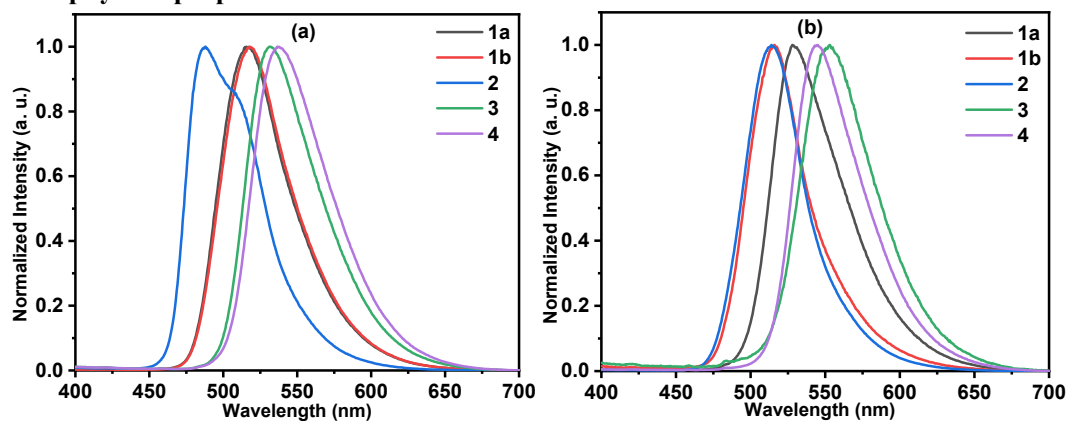

Fig. S2 The PL spectra of as-prepared complexes in PMMA films (1 wt%), (a) and in neat powder (b).

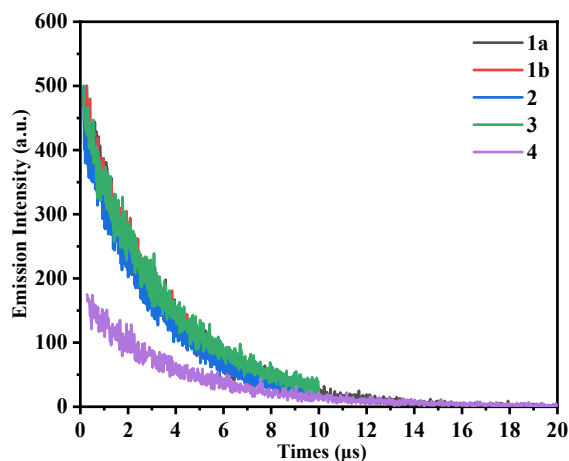

Fig. S3 The emission decay curves of as-prepared complexes in PMMA films at a conc. of 1 wt%.

#### 4. The supplementary device data

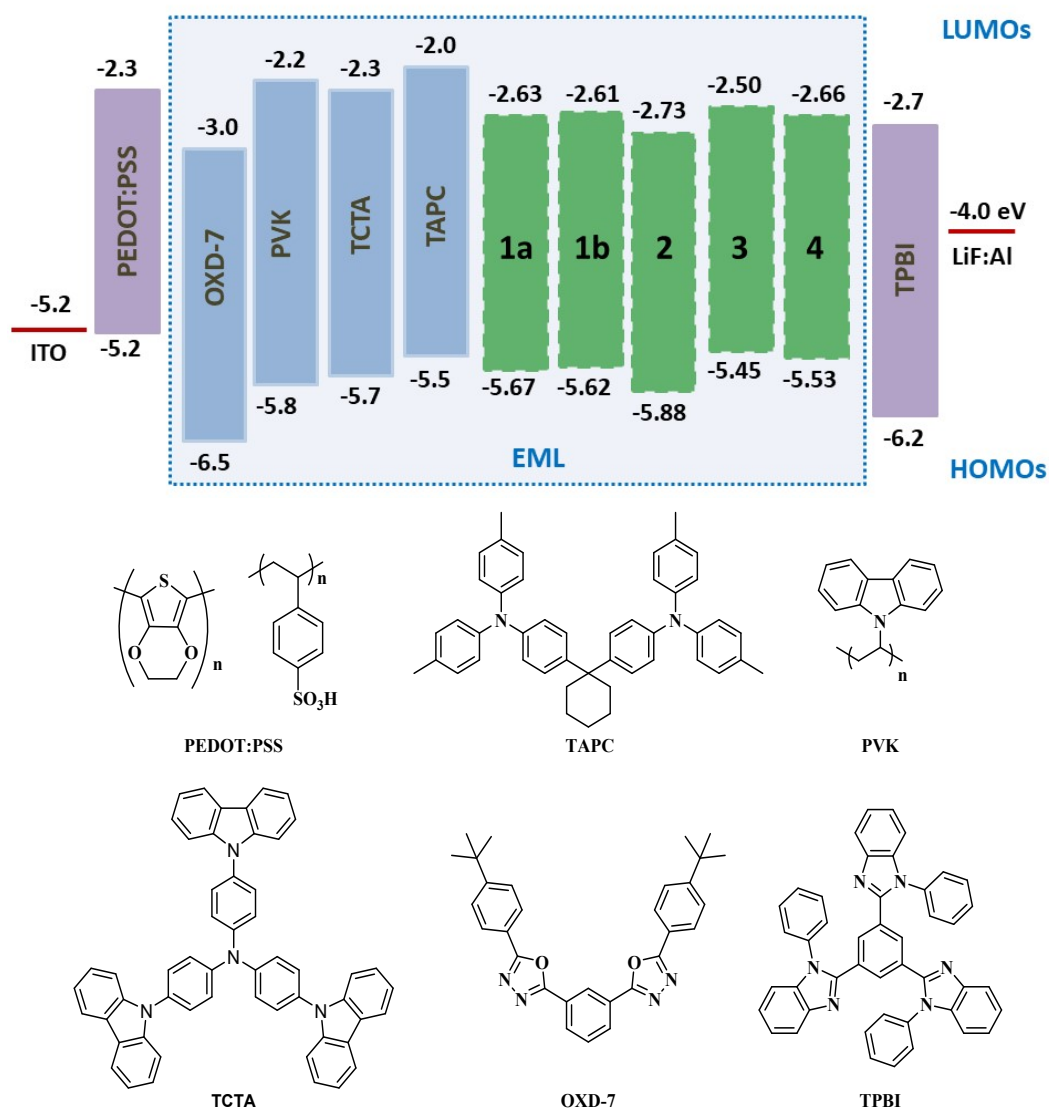

Fig. S4 Energy level diagram and the molecular formula of materials used in OLED devices.

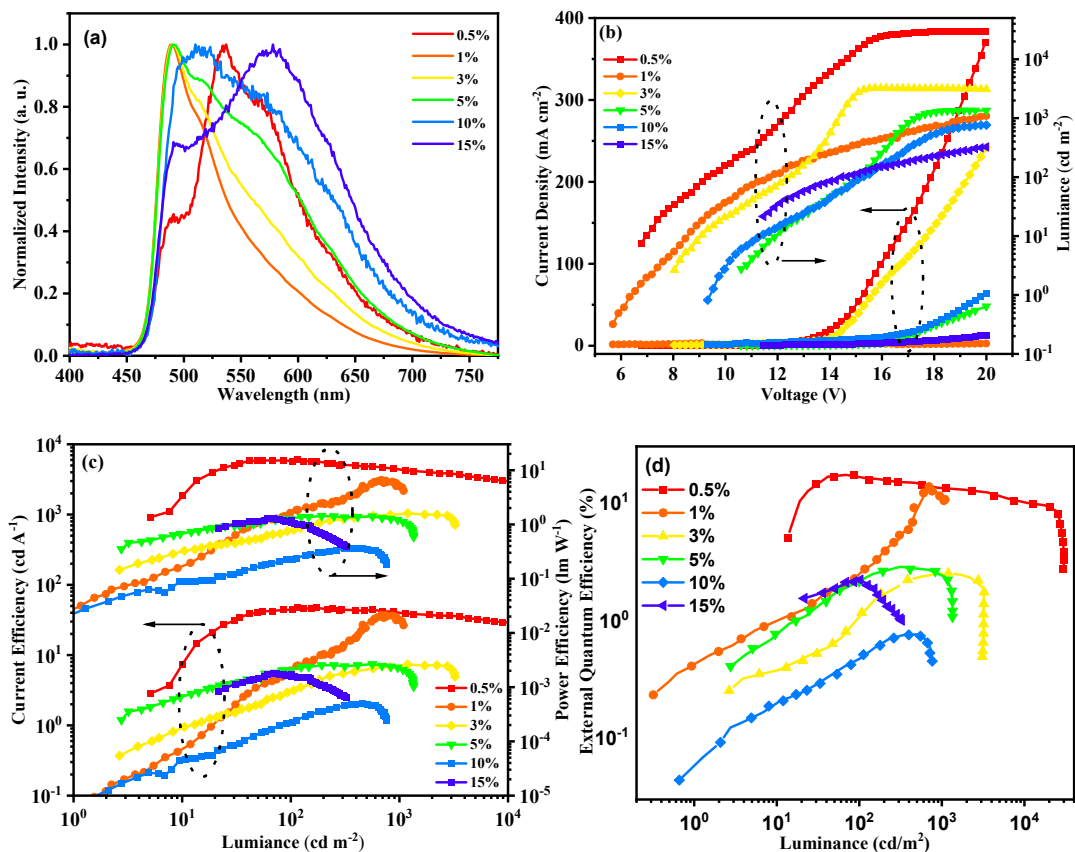

**Fig. S5** (a) Electroluminescence spectra of the doped devices based on complex **2**. (b) Current density-voltage-luminance (J-V-L) characteristics of devices. (c) The current efficiency-luminance-power efficiency characteristics of devices. (d) The EQE-luminance characteristics of devices.

**Table S2** Summary of device luminescence and efficiency data of complex **2**.

| Device<br>(content) | $\lambda_{EL}$<br>(nm) | $V_{on}$<br>(V) | $L_{max}$<br>(cd/m <sup>2</sup> ) | $CE_{max}$<br>(cd/A) | $PE_{max}$<br>(lm/W) | $EQE_{max}$<br>(%) | $CIE_{x,y}$<br>coordinates |
|---------------------|------------------------|-----------------|-----------------------------------|----------------------|----------------------|--------------------|----------------------------|
| S1 (0.5%)           | 514                    | 5.6             | 30137                             | 47.0                 | 15.5                 | 17.2               | (0.38, 0.54)               |
| S2 (1%)             | 488                    | 6.5             | 1092                              | 36.8                 | 6.6                  | 14.1               | (0.27, 0.50)               |
| S3 (3%)             | 490                    | 7.6             | 3251                              | 7.4                  | 1.6                  | 2.5                | (0.31, 0.51)               |
| S4 (5%)             | 490                    | 9.6             | 1353                              | 7.4                  | 1.4                  | 2.8                | (0.35, 0.51)               |
| S5 (10%)            | 536                    | 9.5             | 764                               | 2.0                  | 0.7                  | 0.8                | (0.38, 0.52)               |
| S6 (15%)            | 578                    | 9.1             | 324                               | 5.4                  | 1.3                  | 2.2                | (0.42, 0.50)               |

5. The  $^1\text{H}/^{19}\text{F}$  NMR and high-resolution mass spectrometers (HRMS) spectra of all new compounds

1a:

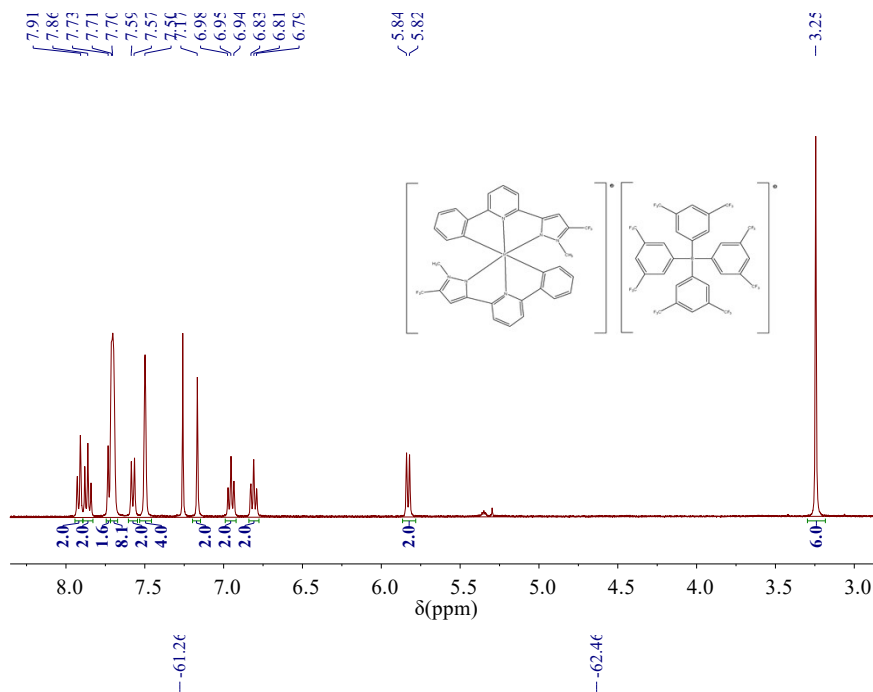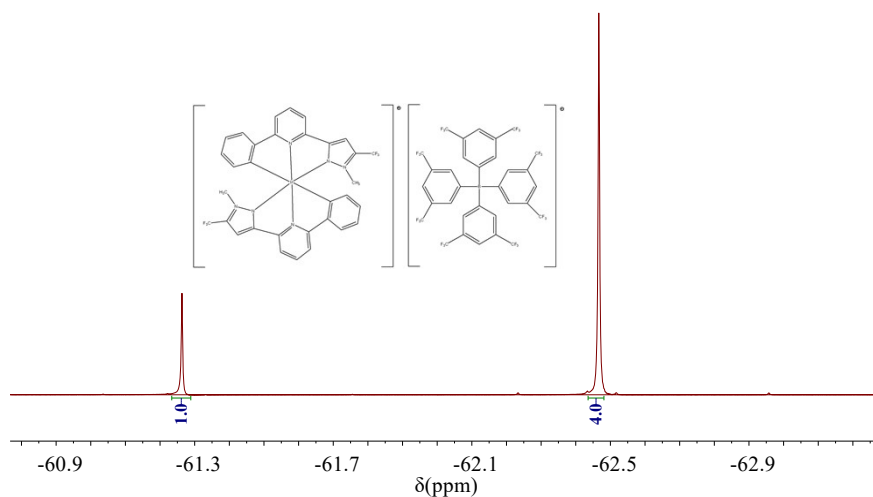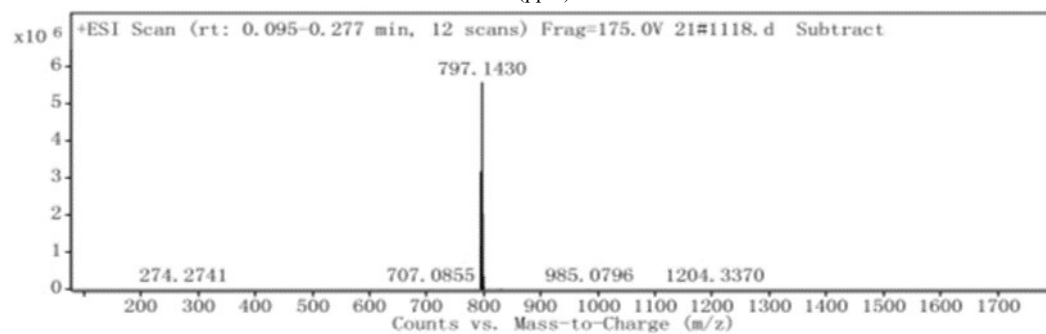

1b:

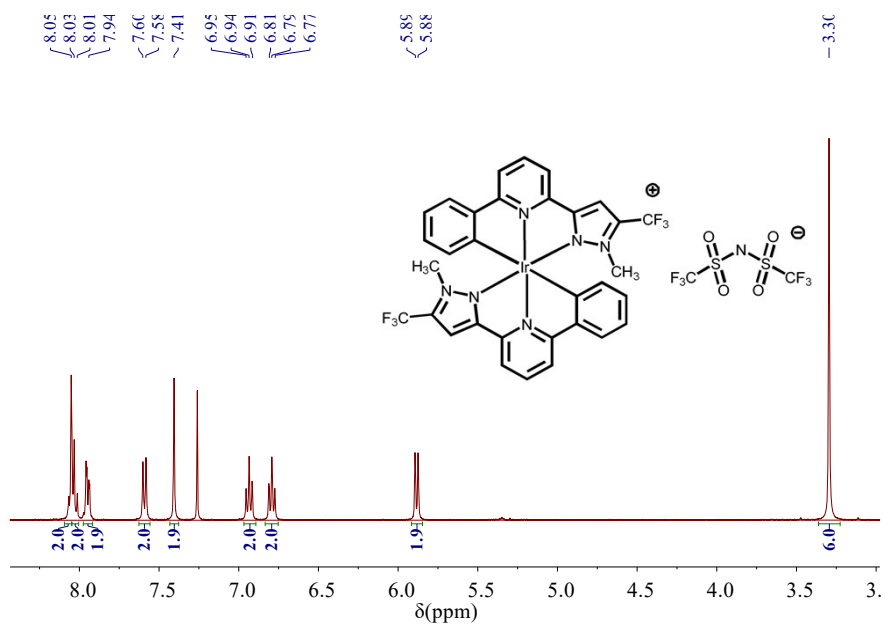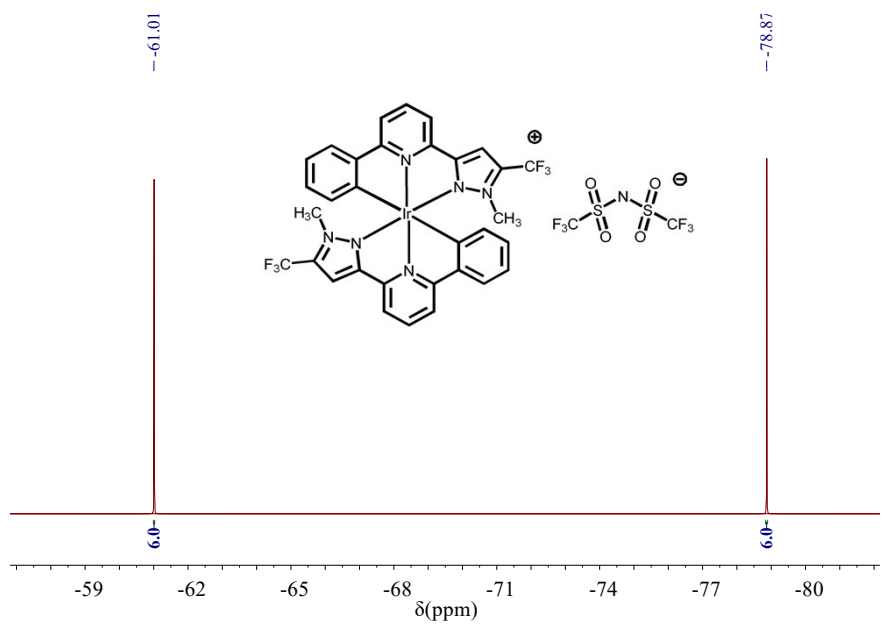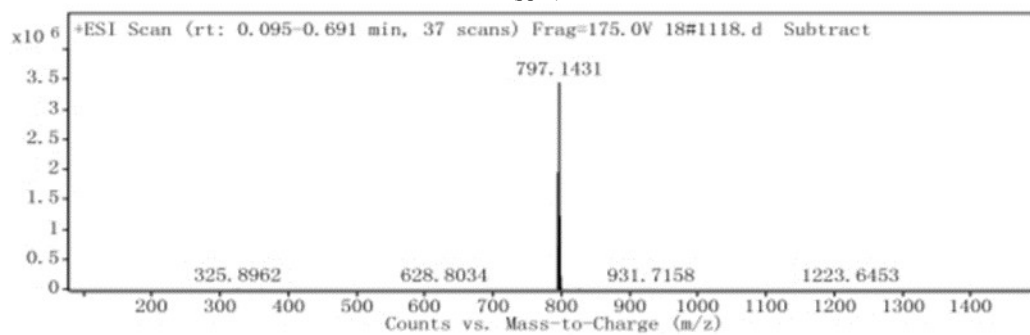

2:



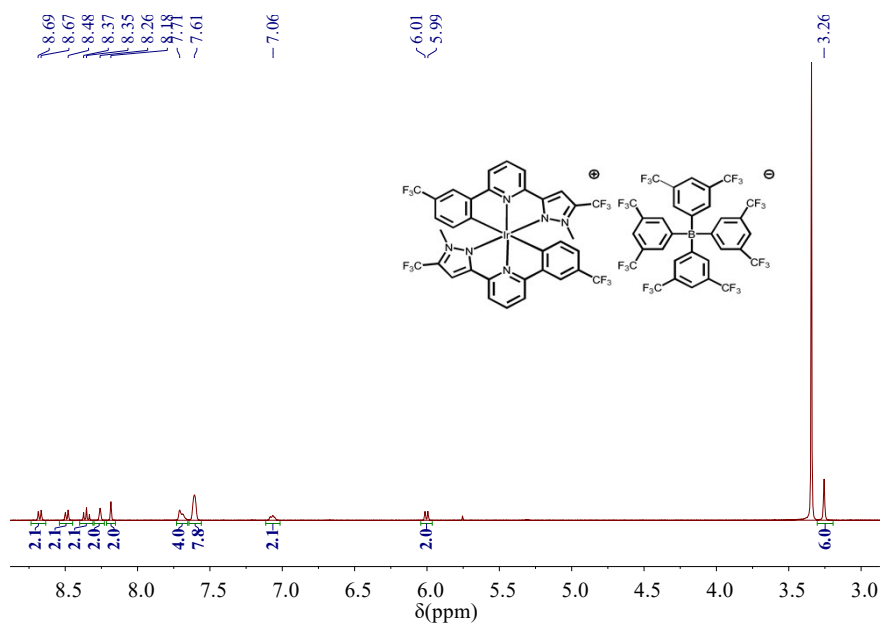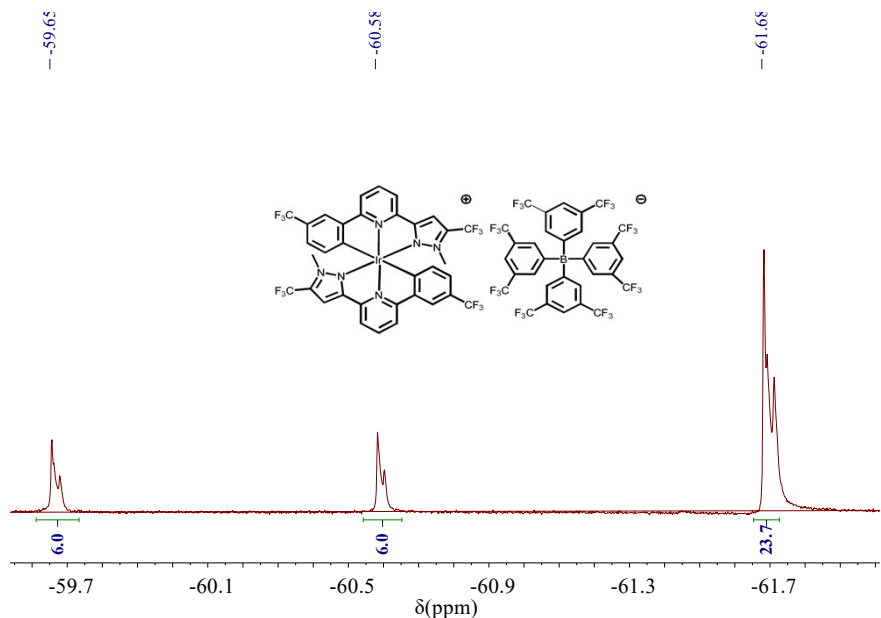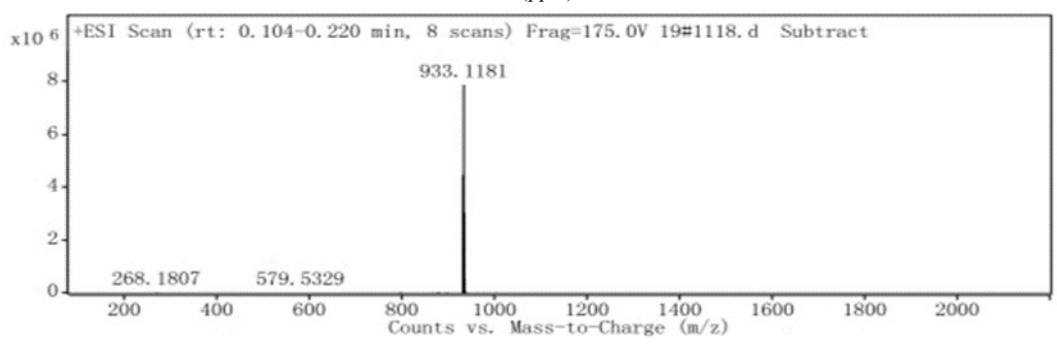

3:

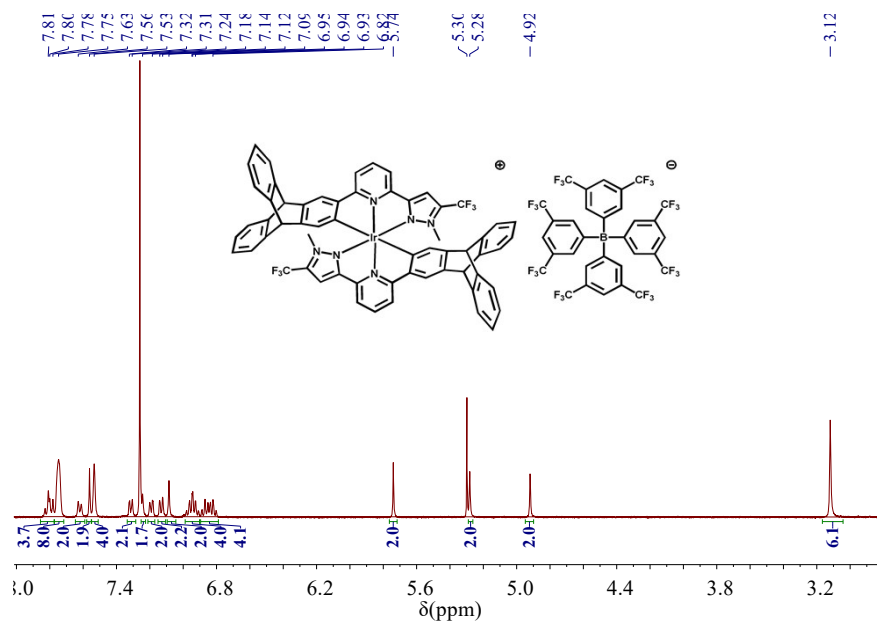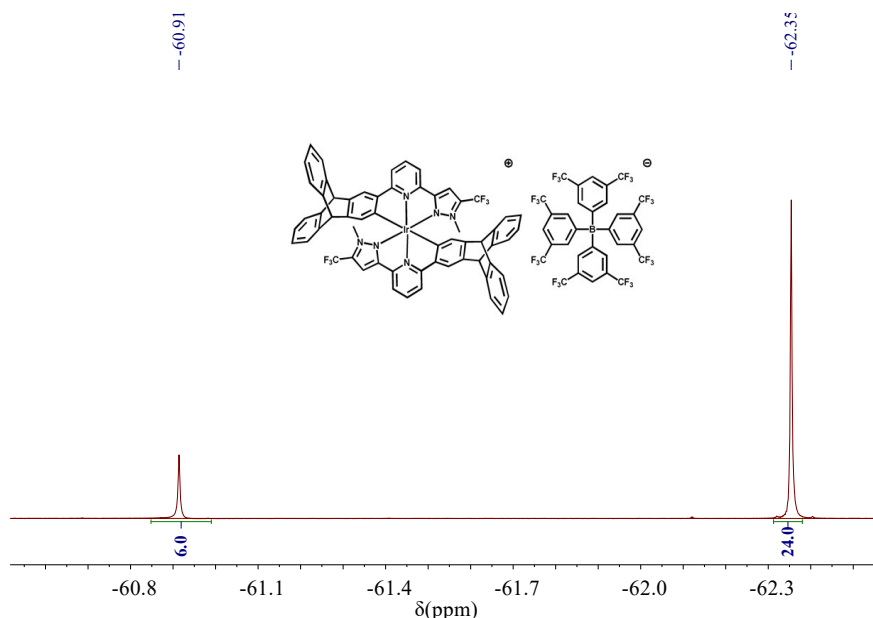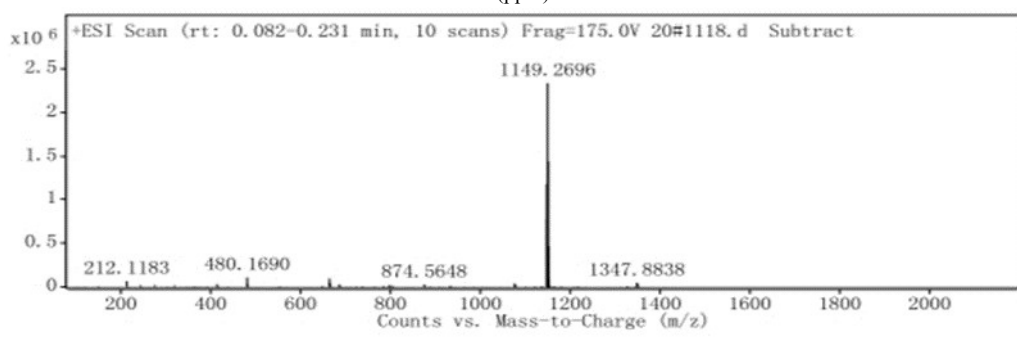

4:

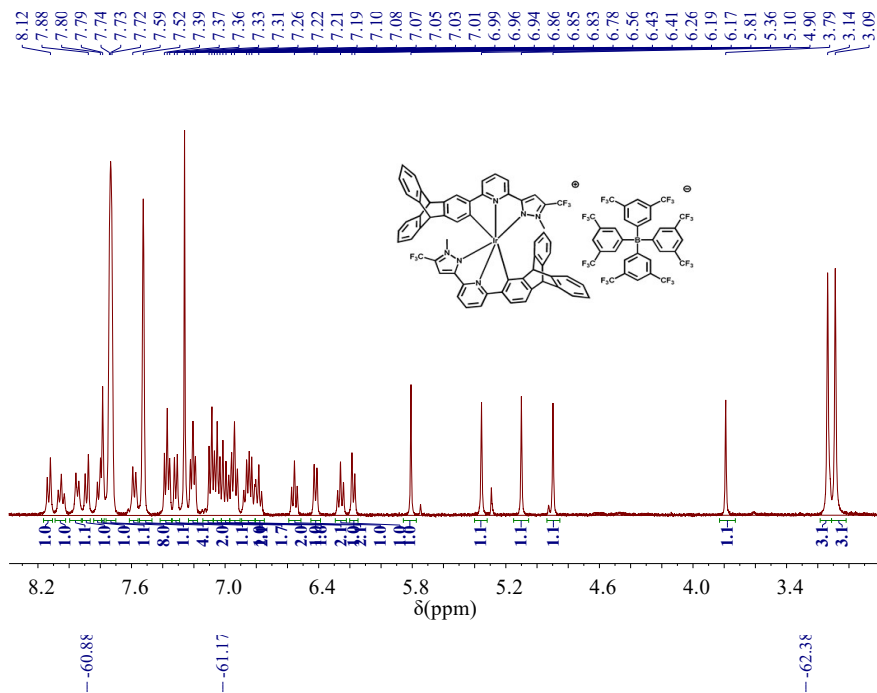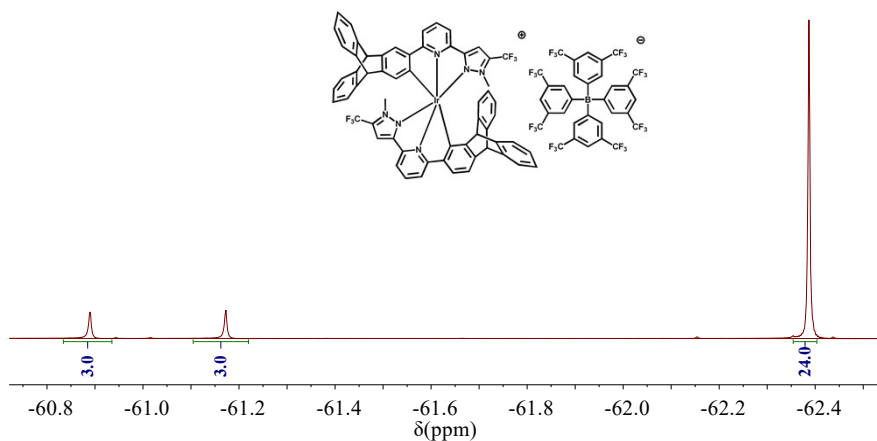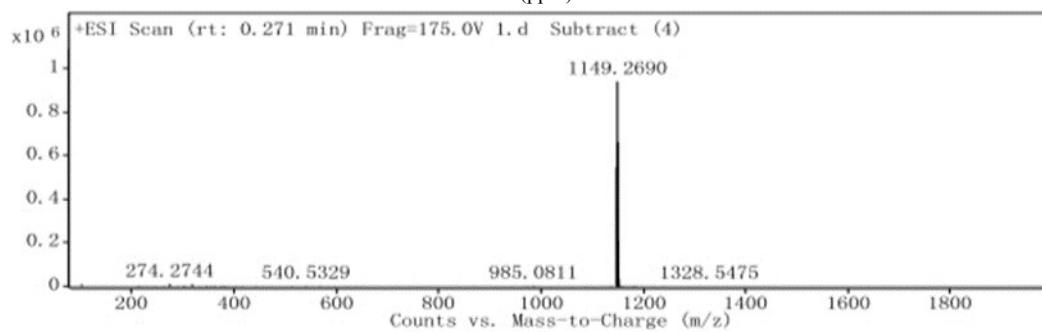

## 6. References

- [1] Becke AD. Density-functional thermochemistry. III. The role of exact exchange, *J Chem Phys*, 1993; 98: 5648–5652; b) Lee C, Yang W and Parr RG. Development of the Colic-Salvetti correlation-energy formula into a functional of the electron density. *Phys Rev B*, 1988; 37:

785–789.

[2] Hay PJ and Wadt WRJ. Ab initio effective core potentials for molecular calculations. Potentials for the transition metal atoms Sc to Hg. Chem Phys, 1985; 82: 270–283; b) Wadt WR and Hay PJJ. Ab initio effective core potentials for molecular calculations. Potentials for main group elements Na to Bi. Chem Phys, 1985; 82: 284–298; c) Hay PJ and Wadt WR. Ab initio effective core potentials for molecular calculations. Potentials for K to Au including the outermost core orbitals. J Chem Phys, 1985; 82: 299–310.

[3] Hariharan PC and Pople JA. Accuracy of AH n equilibrium geometries by single determinant molecular orbital theory. Mol Phys, 1974; 27: 209–214.

[4] Lu T and Chen FW. Multiwfn: a multifunctional wavefunction analyzer. J Comput Chem, 2012; 33: 580–592.

[5] Humphrey W, Dalke A and Schulten K. VMD - visual molecular dynamics. J Molec Graphics, 1996; 14: 33–38.

[6] Frisch MJ, Trucks GW, Schlegel HB, Scuseria GE, Robb MA, Cheeseman JR, et al. Gaussian 16, Rev. B.01, Gaussian, Inc., Wallingford CT, 2016.
